# Supplementary material
Source: PubMed Central journal article supplement (PMC4824855)

## **Supplemental experimental procedures**

### *Digital imaging fluorescence microscopy*

Cytospins were fixed for 10 min with 4% of paraformaldehyde (PFA), permeabilized for 10 min with 0.1% of Triton-X followed by blocking with 10% fetal calf serum (FCS) for 1 h. Nuclei were stained with 4',6-diamidino-2-phenylindole (DAPI). Images were obtained using the the Zeiss Axiovert 200M Marianas™ inverted microscope connected to a Cooke Sensicam SVGA CCD camera (Cooke Co., Tonawanda, NY). Data acquisition and processing was performed using SlideBook™ software (SlideBook™ version 5.5.2.0, [Intelligent Imaging Innovations, Denver, CO]).

## Supplemental Tables

**Supplemental Table S1.** Characteristics of high AAI and low AAI AML patients.

| <b>Patient characteristics</b> | <b>High AAI</b>   | <b>Low AAI</b>    |
|--------------------------------|-------------------|-------------------|
| <b>FAB classification</b>      | <b>n (%)</b>      | <b>n (%)</b>      |
| M0                             | 2 (7.1)           | 2 (6.5)           |
| M1                             | 5 (17.9)          | 3 (9.7)           |
| M2                             | 5 (17.9)          | 7 (22.6)          |
| M3                             | 0 (0)             | 2 (6.5)           |
| M4                             | 3 (10.7)          | 7 (22.6)          |
| M5                             | 8 (28.6)          | 5 (16.2)          |
| M6                             | 1 (3.6)           | 1 (3.2)           |
| Raeb-t                         | 2 (7.1)           | 3 (9.7)           |
| Unclassified                   | 2 (7.1)           | 1 (3.2)           |
| <b>Cytogenetics</b>            |                   |                   |
| Favorable                      | 3 (10.7)          | 4 (12.9)          |
| Intermediate                   | 13 (46.4)         | 19 (61.3)         |
| Poor                           | 4 (14.3)          | 2 (6.5)           |
| Not available                  | 8 (28.6)          | 6 (19.4)          |
| <b>Gender</b>                  |                   |                   |
| Female                         | 12 (42.9)         | 20 (64.5)         |
| Male                           | 16 (57.1)         | 11 (35.5)         |
| <b>Age median (range)</b>      | <b>52 (19-77)</b> | <b>62 (23-76)</b> |

**Supplemental Table S2.** Expression of apoptosis-related proteins in lymphocytes from AML BM at diagnosis and normal BM (nBM).

|               | <b>AML mean <math>\pm</math> SD</b> | <b>AML median (range)</b> | <b>nBM mean <math>\pm</math> SD</b> | <b>nBM median (range)</b> | <b>Significance</b> |
|---------------|-------------------------------------|---------------------------|-------------------------------------|---------------------------|---------------------|
| <b>BCL-2</b>  | 23.4 $\pm$ 13.8                     | 24.2 (2.8-56.6)           | 11.1 $\pm$ 4.2                      | 10.7 (3.8-19)             | 0.016               |
| <b>BCL-XL</b> | 3.1 $\pm$ 2.2                       | 2.7 (0.6-11.8)            | 2.9 $\pm$ 1.1                       | 2.6 (1.4-4.5)             | 0.714               |
| <b>MCL-1</b>  | 6.7 $\pm$ 3.8                       | 6.8 (0.9-23.4)            | 5.5 $\pm$ 2.3                       | 4.8 (3.1-10.5)            | 0.197               |
| <b>BAX</b>    | 3.1 $\pm$ 2.8                       | 2.4 (0.6-16.3)            | 3.2 $\pm$ 1.1                       | 3.7 (1.6-4.9)             | 0.167               |

**Supplemental Table S3.** Overview of high AAI and low AAI AML patients used in contact cultures and proteomics experiments.

|                 | AML samples used | AAI at diagnosis | Bcl-2 at diagnosis | Contact cultures | The whole secretome analysis | Exosome analysis |
|-----------------|------------------|------------------|--------------------|------------------|------------------------------|------------------|
| <b>High AAI</b> | AML 1            | 220.3            | 18.8               | +                | +                            | -                |
|                 | AML 2            | 316              | 15.1               | +                | +                            | +                |
|                 | AML 3            | 374.4            | 24                 | +                | +                            | -                |
|                 | AML 4            | 687.4            | 21.8               | +                | +                            | -                |
|                 | AML 5            | 631.4            | 18.9               | +                | -                            | -                |
|                 | AML 6            | 222.9            | 16                 | +                | +                            | -                |
| <b>Low AAI</b>  | AML 7            | 15.8             | 3.6                | +                | +                            | +                |
|                 | AML 8            | 14.3             | 2.6                | +                | +                            | -                |
|                 | AML 9            | 34.6             | 11.5               | +                | +                            | -                |
|                 | AML 10           | 2.1              | 2.7                | -                | +                            | -                |
|                 | AML 11           | 3.6              | 4.8                | -                | +                            | -                |
|                 | AML 12           | 4                | 4.8                | -                | +                            | -                |
|                 | AML 13           | 17.8             | 5                  | +                | -                            | -                |
|                 | AML 14           | 20.6             | 4.5                | +                | -                            | -                |
|                 | AML 15           | 1.6              | 5.8                | +                | -                            | -                |
|                 | AML 16           | 3                | 2.2                | +                | -                            | -                |

**Supplemental Table S4. Spontaneous changes in BCL-2 expression in high and low AAI samples.** BCL-2 expression (MFI) in a panel of high AAI and low AAI patient samples measured in freshly isolated cells upon diagnosis, upon thawing samples (for contact cultures or secretome production) and after 24 h incubation in culture media.

|                 | Sample | BCL-2 at diagnosis | BCL-2 upon thawing | BCL-2 after 24 h of incubation |
|-----------------|--------|--------------------|--------------------|--------------------------------|
| <b>High AAI</b> | AML18  | 15.2               | 25.5               | 37.5                           |
|                 | AML19  | 33.1               | 51.2               | 50.3                           |
|                 | AML21  | 21.9               | 78.9               | 42.0                           |
|                 | AML22  | 27.4               | 60.0               | 67.4                           |
| <b>Low AAI</b>  | AML17  | 3.6                | 26.4               | 24.4                           |
|                 | AML20  | 5.2                | 49.6               | 32.3                           |

**Supplemental Table S7.** Top 39 proteins upregulated in the secretome of low AAI AML patients in comparison to high AAI AML patients.

| Protein description                                                     | Human gene symbol | Mean spectral count |          | Fold Change* | p value |
|-------------------------------------------------------------------------|-------------------|---------------------|----------|--------------|---------|
|                                                                         |                   | Low AAI             | High AAI |              |         |
| Transmembrane emp24 domain-containing protein 7                         | <b>TMED7</b>      | 2.26                | 0.00     | ∞            | 0.000   |
| Cathepsin H                                                             | <b>CTSH</b>       | 1.79                | 0.00     | ∞            | 0.005   |
| Keratin, type II cuticular Hb4                                          | <b>KRT84</b>      | 2.36                | 0.00     | ∞            | 0.007   |
| Calpain-2 catalytic subunit                                             | <b>CAPN2</b>      | 1.92                | 0.00     | ∞            | 0.011   |
| Isoform 14 of Dysferlin                                                 | <b>DYSF</b>       | 0.92                | 0.00     | ∞            | 0.014   |
| Neutrophil gelatinase-associated lipocalin                              | <b>LCN2</b>       | 0.92                | 0.00     | ∞            | 0.021   |
| Isoform 1 of Dynamin-2                                                  | <b>DNM2</b>       | 1.19                | 0.00     | ∞            | 0.023   |
| dolichyl-diphosphooligosaccharide-protein glycosyltransferase precursor | <b>DDOST</b>      | 1.73                | 0.00     | ∞            | 0.026   |
| Platelet basic protein                                                  | <b>PPBP</b>       | 3.91                | 0.00     | ∞            | 0.028   |
| Vacuolar protein sorting-associated protein 26B                         | <b>VPS26B</b>     | 1.47                | 0.00     | ∞            | 0.031   |
| C-C motif chemokine 3                                                   | <b>CCL3</b>       | 2.03                | 0.00     | ∞            | 0.032   |
| Isoform 2 of Cytochrome b5                                              | <b>CYB5A</b>      | 0.96                | 0.00     | ∞            | 0.035   |
| Galectin-3                                                              | <b>LGALS3</b>     | 12.48               | 0.16     | 79.38        | 0.006   |
| Coagulation factor XIII A chain                                         | <b>F13A1</b>      | 8.36                | 0.47     | 17.73        | 0.018   |
| Eosinophil lysophospholipase                                            | <b>CLC</b>        | 1.89                | 0.16     | 11.92        | 0.046   |
| Isoform 1 of Scavenger receptor cysteine-rich type 1 protein M130       | <b>CD163</b>      | 3.06                | 0.31     | 9.77         | 0.048   |
| Lysosomal Pro-X carboxypeptidase                                        | <b>PRCP</b>       | 3.49                | 0.47     | 7.43         | 0.001   |
| Serpin B10                                                              | <b>SERPINB10</b>  | 11.40               | 1.57     | 7.27         | 0.013   |
| 47 kDa protein                                                          | <b>HP</b>         | 8.42                | 1.17     | 7.16         | 0.015   |
| Ectonucleotide pyrophosphatase/phosphodiesterase family member 4        | <b>ENPP4</b>      | 1.56                | 0.31     | 4.97         | 0.025   |
| Maltase-glucoamylase, intestinal                                        | <b>MGAM</b>       | 4.89                | 1.25     | 3.90         | 0.006   |
| Putative uncharacterized protein DKFZp686P15220                         | <b>IGHG1</b>      | 9.05                | 2.36     | 3.83         | 0.015   |
| Putative uncharacterized protein TOR1AIP1                               | <b>TOR1AIP1</b>   | 4.10                | 1.17     | 3.50         | 0.003   |
| Keratin, type II cytoskeletal 6A                                        | <b>KRT6A</b>      | 3.62                | 1.04     | 3.49         | 0.007   |
| Fructose-1,6-bisphosphatase 1                                           | <b>FBP1</b>       | 19.42               | 5.61     | 3.46         | 0.006   |
| Ferritin                                                                | <b>FTL</b>        | 43.65               | 15.74    | 2.77         | 0.024   |
| Dipeptidyl-peptidase 2                                                  | <b>DPP7</b>       | 14.73               | 5.39     | 2.74         | 0.050   |
| Succinyl-CoA:3-ketoacid-coenzyme A transferase 1, Mitochondrial         | <b>OXCT1</b>      | 6.32                | 2.34     | 2.70         | 0.032   |
| Azurocidin                                                              | <b>AZU1</b>       | 12.16               | 4.66     | 2.61         | 0.010   |
| HSPA5 protein                                                           | <b>HSPA5</b>      | 87.30               | 36.06    | 2.42         | 0.003   |
| Non-secretory ribonuclease                                              | <b>RNASE2</b>     | 27.32               | 11.44    | 2.39         | 0.006   |
| Endoplasmin                                                             | <b>HSP90B1</b>    | 13.89               | 5.92     | 2.35         | 0.025   |
| Prolyl endopeptidase                                                    | <b>PREP</b>       | 8.80                | 3.76     | 2.34         | 0.042   |
| Protein disulfide-isomerase                                             | <b>P4HB</b>       | 31.06               | 13.81    | 2.25         | 0.021   |
| N(4)-(beta-N-acetylglucosaminy)-L-asparaginase                          | <b>AGA</b>        | 12.11               | 5.57     | 2.17         | 0.036   |
| Glutathione synthetase                                                  | <b>GSS</b>        | 16.30               | 7.63     | 2.13         | 0.012   |
| Isoform 1 of Leukotriene A-4 hydrolase                                  | <b>LTA4H</b>      | 43.51               | 21.50    | 2.02         | 0.047   |
| Isocitrate dehydrogenase [NADP] cytoplasmic                             | <b>IDH1</b>       | 10.74               | 5.33     | 2.01         | 0.015   |
| cDNA FLJ53927, highly similar to Beta-hexosaminidase alpha chain        | <b>HEXA</b>       | 8.28                | 4.12     | 2.01         | 0.027   |

\* - ∞ - unique protein

## **Supplemental Figures**

**Supplemental Figure S1. Functional clusters of proteins upregulated in the lysates of high AAI and low AAI primary AML cells.** The figure depicts top 5 functional protein clusters identified by Cluster ONE analysis in interaction networks generated in STRING and visualized in Cytoscape. Nodes correspond to upregulated proteins and edges symbolize physical or functional associations. Blue clusters represent proteins upregulated in whole cell lysate of apoptosis-resistant (high AAI) AML cells and green clusters correspond to proteins upregulated in whole cell lysate of apoptosis-sensitive (low AAI) AML blasts. Representative GO terms identified by BiNGO analysis in both high and low AAI AML samples are listed together with the number of proteins (nodes) per cluster and their significance.

**Supplemental Figure S2.** Exosome markers enriched in the purified extracellular vesicles fraction of the secretome. The number of spectral counts is shown for 10 different exosome markers detected in purified extracellular vesicle fraction as well as in soluble secretome of the analyzed high AAI and low AAI patient samples.

**Supplemental Figure S3. Confocal images of high AAI AML cells-derived EVs uptake.** The figure depicts the overall PKH67 uptake in HeLa and low AAI AML cells. HeLa cells after contact culture with PKH67-stained high AAI AML cells show high PKH67 uptake, in contrast to control HeLa cells displaying no PKH67 signal. Similarly, low AAI AML cells show PKH67 signal after incubation with high AAI AML-derived PKH67 stained-EVs, as opposed to control low AAI AML cells.

**Supplemental Figure S4. PKH67-stained vesicle uptake in HeLa and low AAI AML cells.** PKH67 uptake in HeLa and low AAI AML cells was imaged using digitally enhanced fluorescent microscope. The first 2 panels depict control HeLa cells (incubated without EVs) as well as HeLa upon a 4 h incubation with purified PKH67-stained EVs secreted by high AAI AML cells. In contrast to control HeLa cells displaying no PKH67 signal, the cells incubated with purified EVs are clearly positive for this marker. Similarly, low AAI AML cells incubated for 24 h with the cultured medium, obtained from a 24 h culture of PKH67-stained high AAI AML cells, show bright signal corresponding to PKH67 (panel 3). The last panel (panel 4) depicts the positive control (an ALL cell line CCRF-CEM stained with PKH67), characterised by very high signal intensity of PKH67 signal. This shows that recipient cells, which took EVs up can be distinguished from PKH67-stained cells with high confidence.



# Supplemental Figure S1

## High AAI

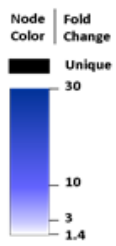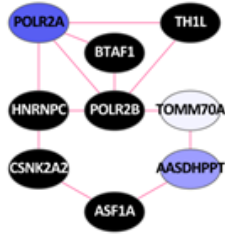

1. RNA processing, transcription, 9 nodes (p=1.82E-04)

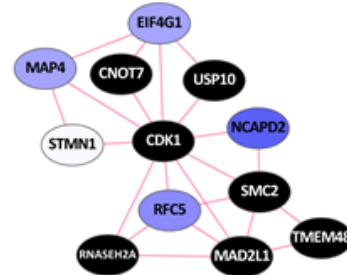

2. Mitotic cell cycle, 12 nodes (p=1.85E-04)

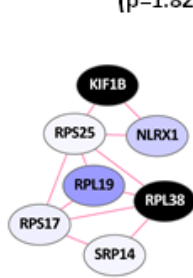

3. Ribosome biogenesis, translation, 7 nodes (p=1.0E-03)

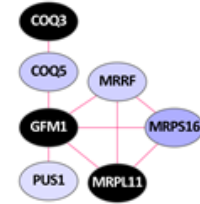

4. Translation, 7 nodes (p=1.4E-03)

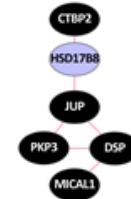

5. Cell adhesion, cell junction formation, 6 nodes (p=3.6E-03)

## Low AAI

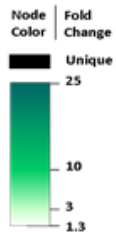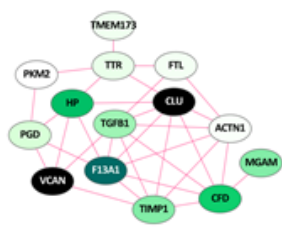

1. Response to stress, innate immune response, 14 nodes (p=6.42E-04)

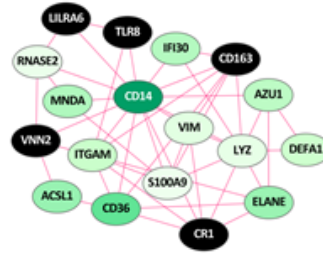

2. Chemotaxis, response to stimulus, 18 nodes (p=6.96E-04)

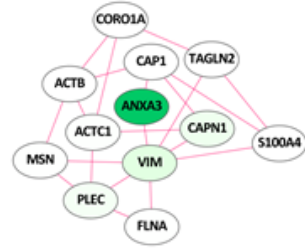

3. Actin cytoskeleton organization, 12 nodes (p=3.59E-03)

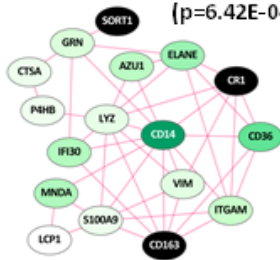

4. Response to stress, defense response (p=1.10E-02)

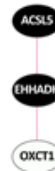

5. Fatty acid metabolic process, 3 nodes (p=2.62E-02)

**Supplemental Figure S2**

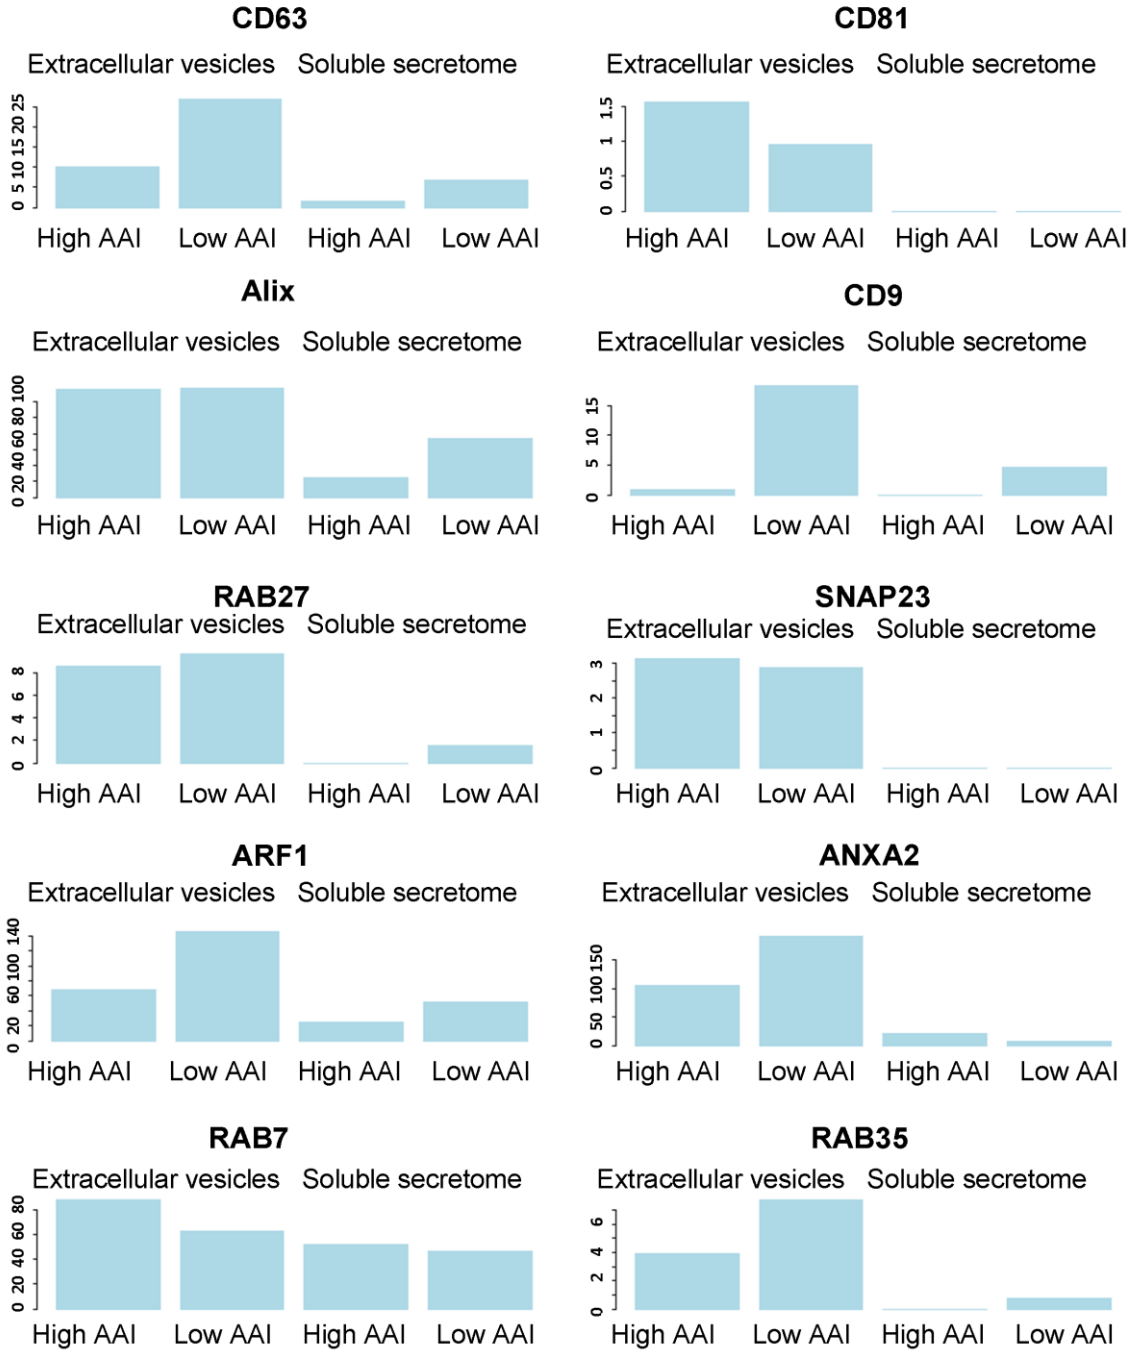

Supplemental Figure S3

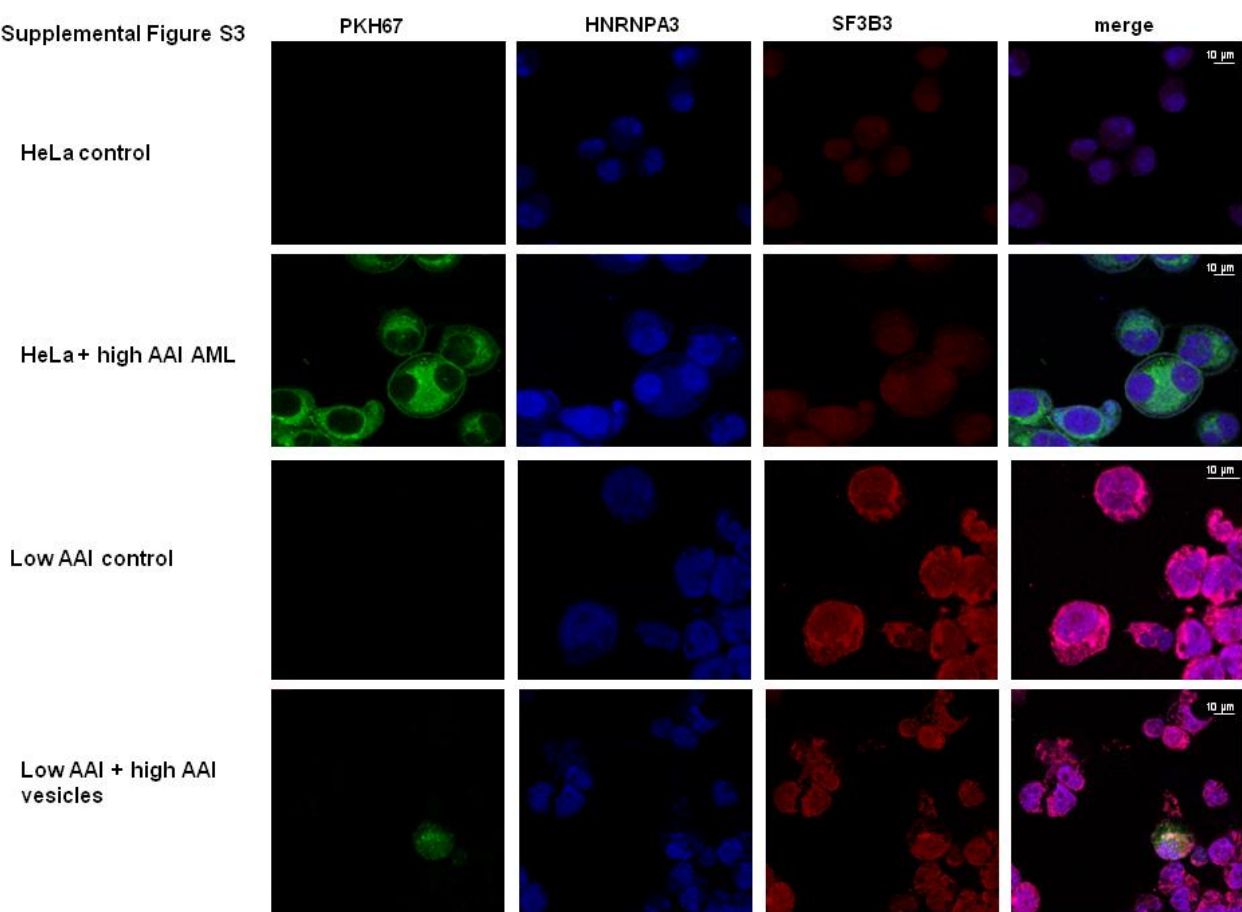

Supplemental Figure S4

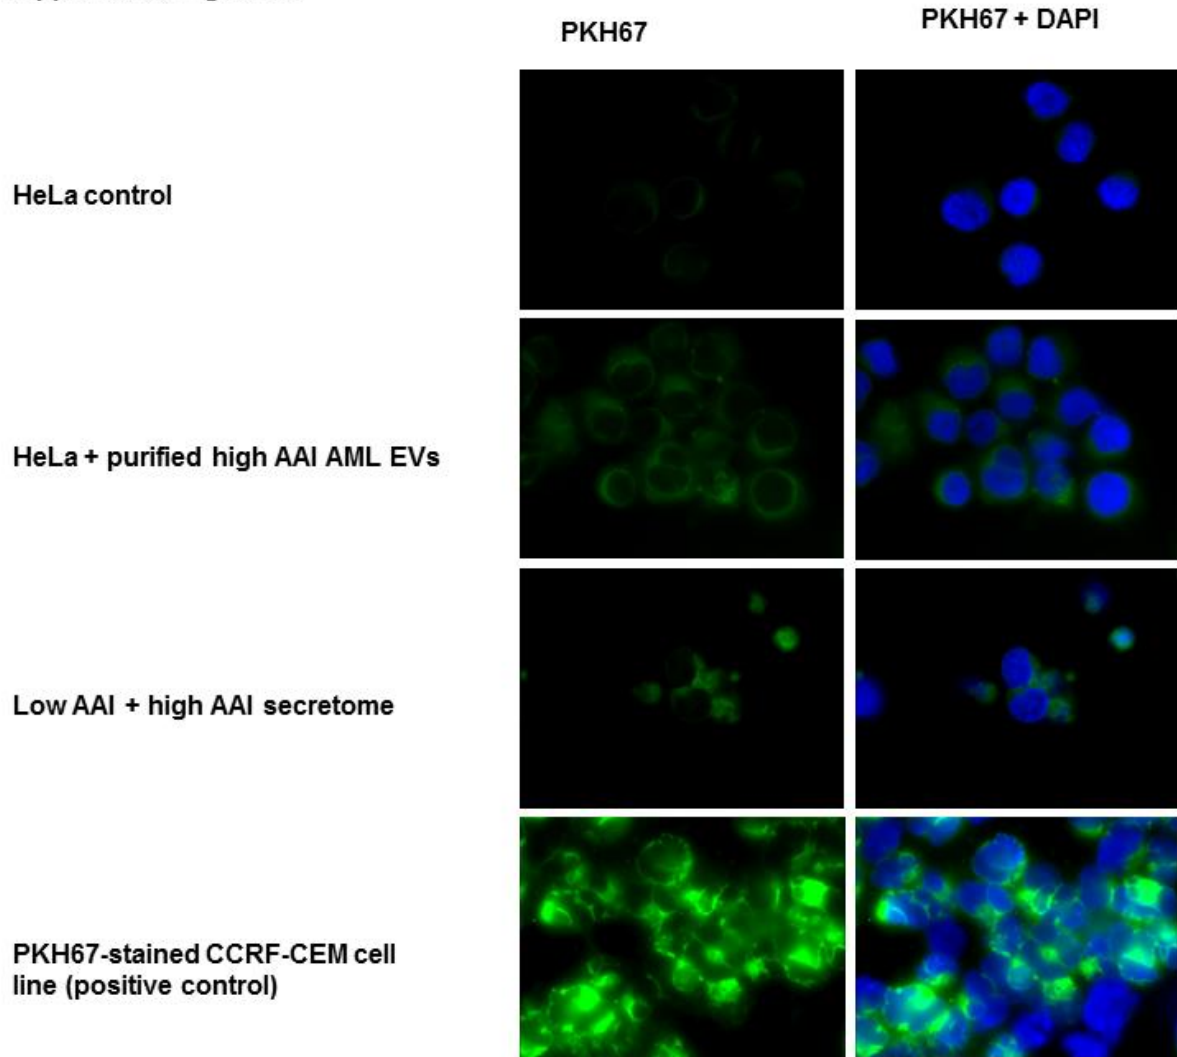

Supplement: 10.1074_M115.052944_mcp.M115.052944-1.pdf [file 10.1074_M115.052944_mcp.M115.052944-1.pdf]
